# Supplementary material for: Oregano Essential Oil Attenuates RAW264.7 Cells from Lipopolysaccharide-Induced Inflammatory Response through Regulating NADPH Oxidase Activation-Driven Oxidative Stress
Source: PubMed Central journal article supplement (PMC6222776; doi:10.3390/molecules23081857), 2018-07-26
Supplement: molecules-23-01857-s001.pdf [file molecules-23-01857-s001.pdf]

**Supplementary Table S1. Chemical composition of oregano essential oil components.**

| <b><u>ANALYSIS OF OREGANO OIL GC-MS</u></b> |                                  |
|---------------------------------------------|----------------------------------|
| <b>Component</b>                            | <b>Oregano oil (MGZ-008) (%)</b> |
| $\alpha$ -Thujene/ $\alpha$ -Pinene         | 0.56                             |
| Camphene                                    | 0.08                             |
| $\beta$ -Pinene                             | 0.09                             |
| Sabinene                                    | 0.03                             |
| Myrcene                                     | 0.91                             |
| $\alpha$ -Phellandrene                      | 0.09                             |
| A-Terpinene                                 | 0.50                             |
| Limonene                                    | 0.15                             |
| 1,8-Cincole+ $\beta$ -phellandrene          | 0.07                             |
| $\beta$ -Ocimene                            | 0.07                             |
| r-Terpinene                                 | 4.54                             |
| 3-Ocimene                                   | 0.07                             |
| P-Cymene                                    | 3.11                             |
| Terpinoiene                                 | 0.05                             |
| 3-Octanoi                                   | 0.11                             |
| 1-Octen-3-ol                                | 0.22                             |
| Dimethyl styrene                            | 0.10                             |
| Trans-Sabinene hydrate                      | 0.14                             |
| Linalool                                    | 0.32                             |
| cis-Sabinene hydrate                        | 0.03                             |
| 1-Terpincol                                 | 0.05                             |
| Terpinen-4-ol                               | 0.22                             |
| Carvacrol methyl ether                      | 0.33                             |
| B-Caryophyllene                             | 1.43                             |
| Dihydrocarvone                              | 0.09                             |
| $\alpha$ -Humulene                          | 0.08                             |
| $\alpha$ -Terpineol                         | 0.21                             |
| Borneol                                     | 0.33                             |
| $\beta$ -Bisabolene                         | 0.71                             |
| Caryophyllene oxide                         | 0.16                             |
| Thymol                                      | 1.90                             |
| Carvacrol                                   | 79.92                            |

*These results relate only to the sample(s) tested and do not guarantee the bulk of the mentioned to the equal quality.*

1 **Supplementary Figure S1.** Typical chromatogram of oregano essential oil components.

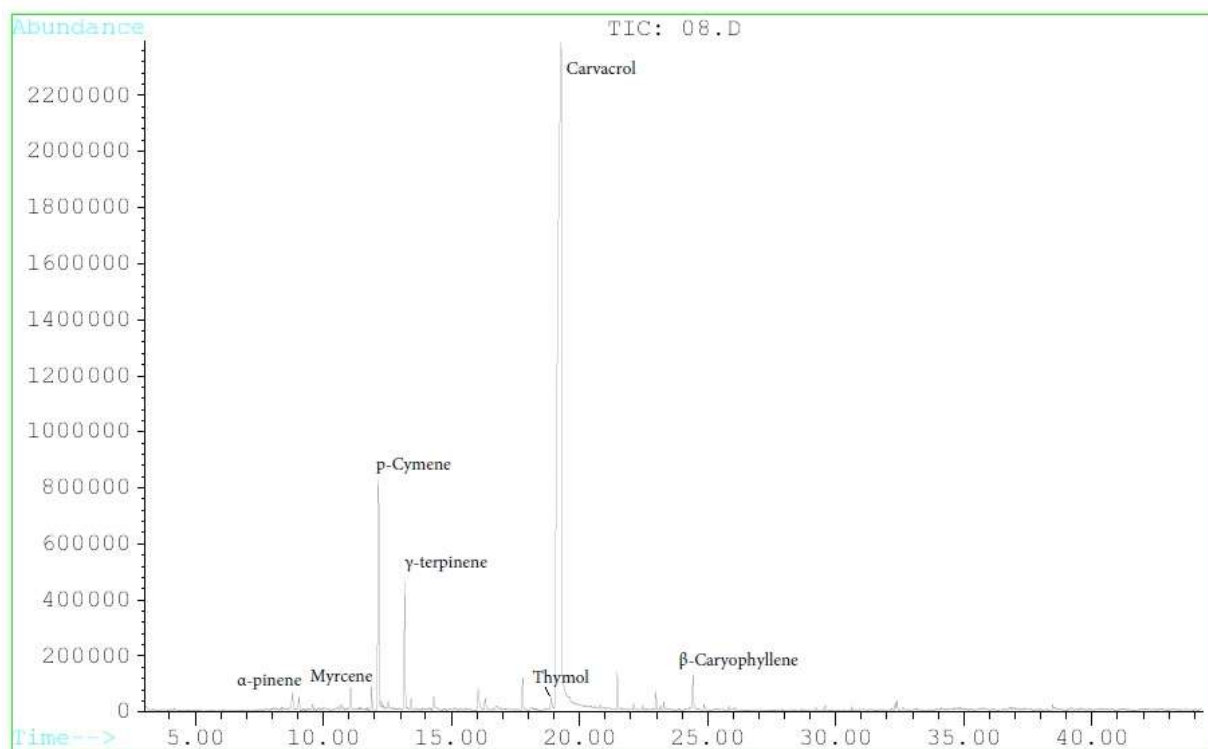

2

3 *The Figure were provided by Meritech Bioengineering Co. Ltd.*

4

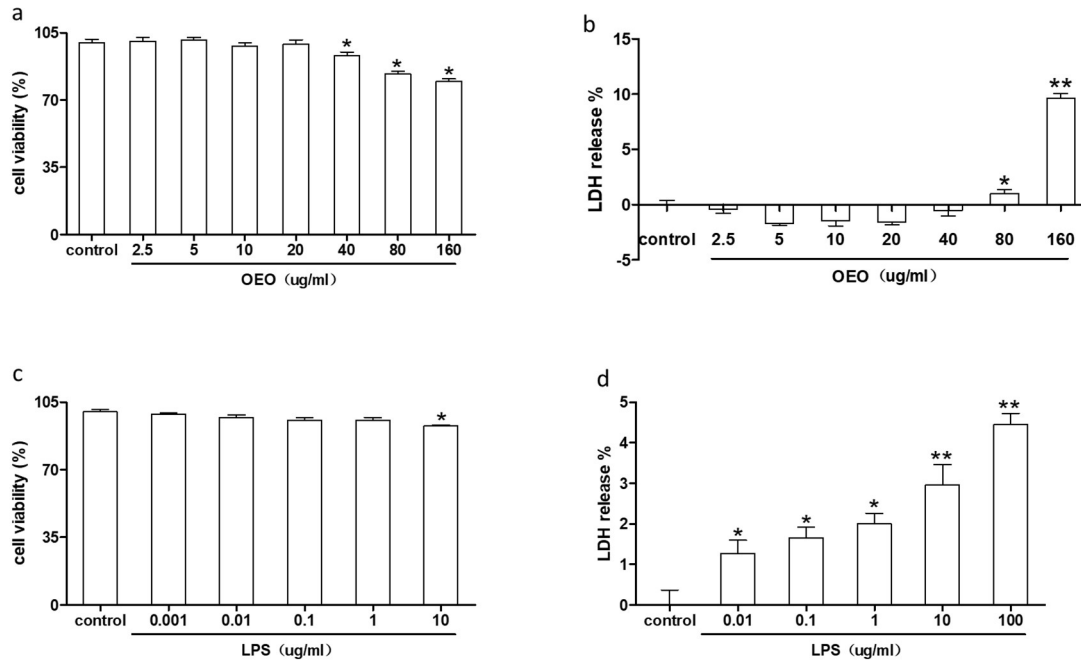

5

6 **Figure S2.** Oregano essential oil (OEO) and LPS induced cytotoxicity in RAW264.7 cells. (a)  
7 RAW264.7 cells were incubated with OEO (2.5–160 µg/ml) for 24 h. Cell viability was  
8 determined by MTT assay. (b) RAW264.7 cells were incubated with LPS (0.01–100 µg/ml) for 24  
9 h. Cell viability was determined by MTT assay. (c) RAW264.7 cells were incubated with OEO  
10 (2.5–160 µg/ml) for 24 h. Cell cytotoxicity was determined by LDH release. (d) RAW264.7 cells  
11 were incubated with LPS (0.01–100 µg/ml) for 24 h. Cell cytotoxicity was determined by LDH  
12 release. Values represent means ± SEM,  $n = 3$ . \* $P < 0.05$  and \*\* $P < 0.01$  compared to the control  
13 group.
